# Supplementary material for: Serum cytokine profiles predict survival benefits in patients with advanced hepatocellular carcinoma treated with sorafenib: a retrospective cohort study
Source: Springer Nature journal article supplement (doi:10.1186/s12885-017-3889-x), 2017-12-01

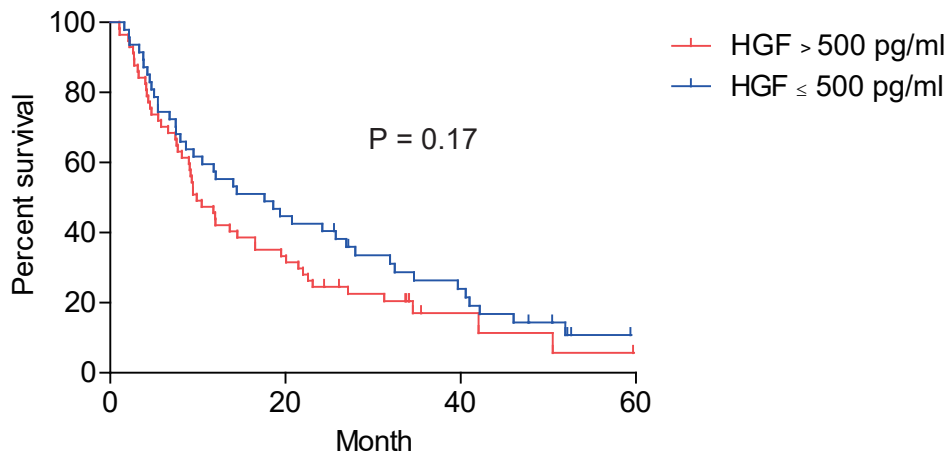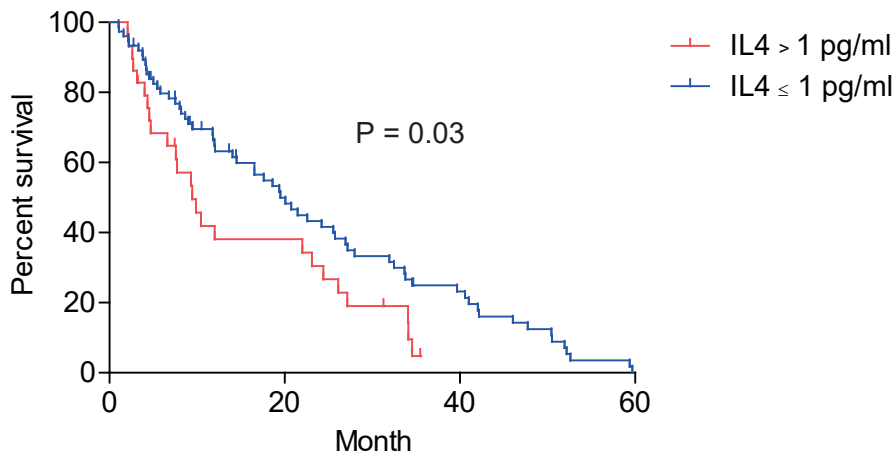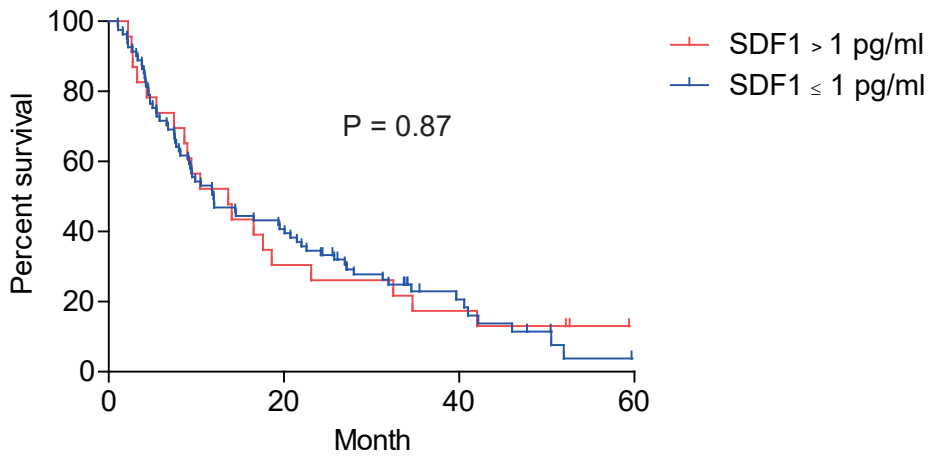

Supplement: MOESM1 [file 15319606]
